# Supplementary material
Source: PubMed Central journal article supplement (PMC1569185)
Supplement: pnas_0604183103_4.pdf [file pnas_0604183103_4.pdf]

# Total cells recovered from rescued spleens of recipient mice

(A) New Born + 4wks

(B) Adult + 4 wks

Recipient mice

*Rag1*<sup>-/-</sup>

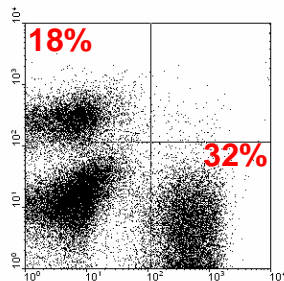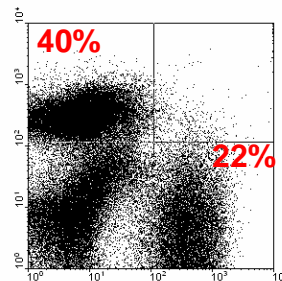

*Il2rγ*<sup>-/-</sup> *Rag2*<sup>-/-</sup>

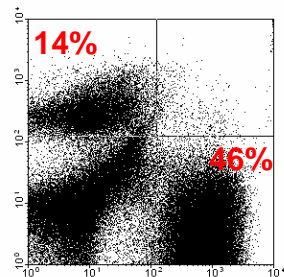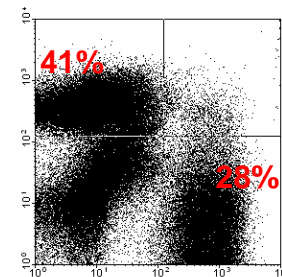

*aly/aly*

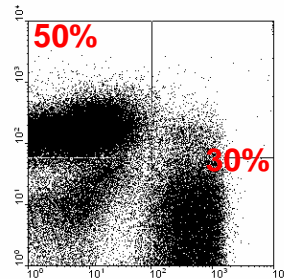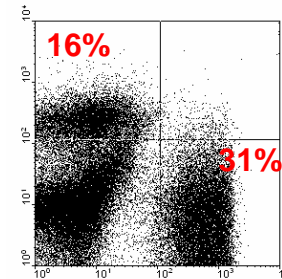

CD19 ↑  
TCRβ →
