# Supplementary material
Source: PubMed Central journal article supplement (PMC1569185)

# Total cells recovered from rescued LN of recipient mice

**(A) New Born + 4wks**

**(B) Adult + 4 wks**

*Rag1*<sup>-/-</sup>

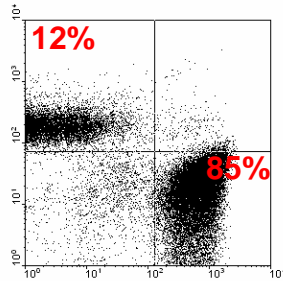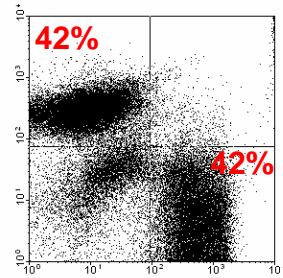

Recipient mice

*Il2rγ*<sup>-/-</sup> *Rag2*<sup>-/-</sup>

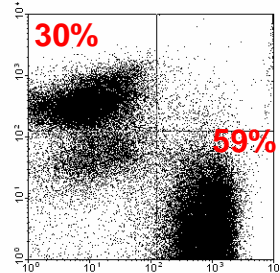

N/A

*aly/aly*<sup>-/-</sup>

N/A

N/A

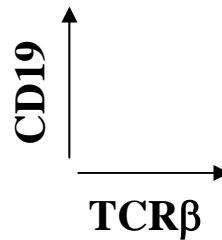

Supplement: pnas_0604183103_5.pdf [file pnas_0604183103_5.pdf]
