# Supplementary material
Source: PubMed Central journal article supplement (PMC1569185)

**Transferred Cell Populations**

(A) T cells  
CD2-GFP

Pre transfer  
Sorted Cell Populations

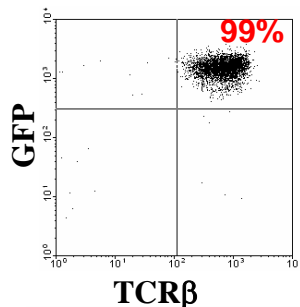

Post transfer  
Spleen

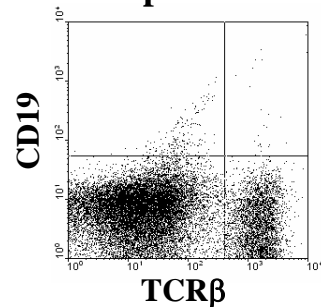

(B) B cells  
CD19-Cre  
Rosa26 EYFP

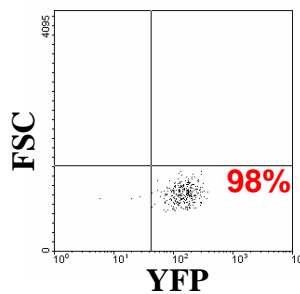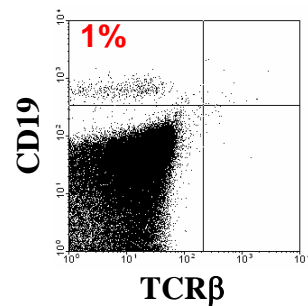

(C) NK1<sup>+</sup> cells  
Rag1<sup>-/-</sup>

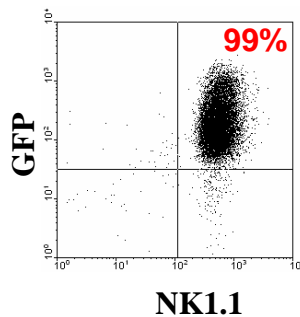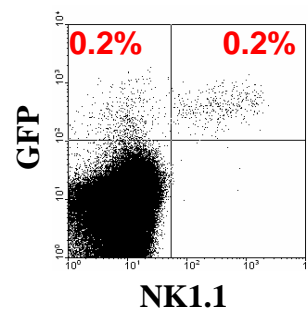

(D) NK1<sup>-</sup> cells  
Rag1<sup>-/-</sup>

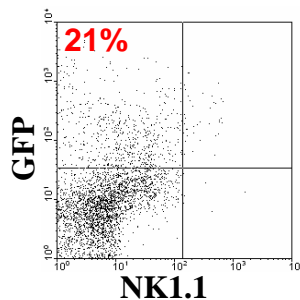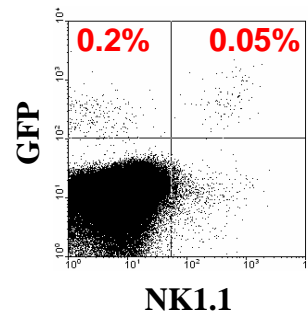

Supplement: pnas_0604183103_6.pdf [file pnas_0604183103_6.pdf]
