# Supplementary material
Source: PubMed Central journal article supplement (PMC1569185)

# Analysis of IL-7 receptor expression in Lymph Node

**(A) New Born**

**(B) Adult**

**T cells**

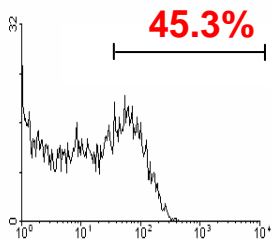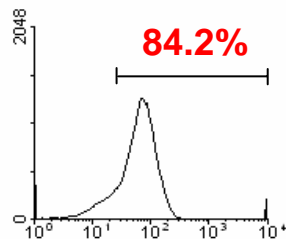

**NK cells**

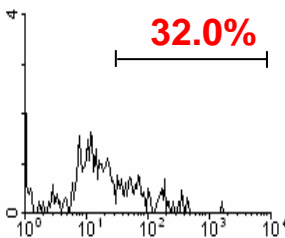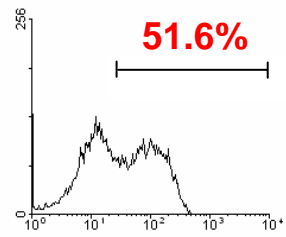

**B cells**

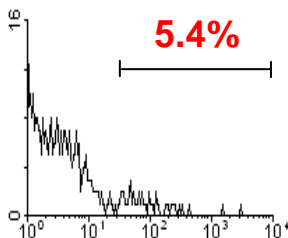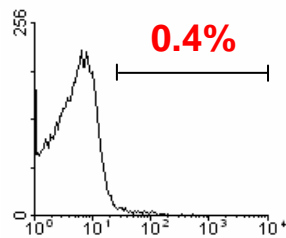

IL-7R $\alpha$

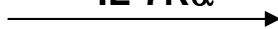

Supplement: pnas_0604183103_8.pdf [file pnas_0604183103_8.pdf]
