# Supplementary material
Source: PubMed Central journal article supplement (PMC1569185)
Supplement: pnas_0604183103_9.pdf [file pnas_0604183103_9.pdf]

**Table 1. Summary of data from the different transfer experiments is shown**

# mice  
LNs analyzed

|  |                                                             | Total LN                   | T cells                   | B cells                   | B cells<br>+ Markers      |
|--|-------------------------------------------------------------|----------------------------|---------------------------|---------------------------|---------------------------|
|  | Adult <i>Rag</i> <sup>-/-</sup>                             | 10<br>Axillary<br>Inguinal |                           |                           |                           |
|  | Adult <i>IL2rγ</i> <sup>-/-</sup> <i>Rag</i> <sup>-/-</sup> | 8<br>N/A                   |                           |                           |                           |
|  | Adult <i>aly/aly</i>                                        | 8<br>N/A                   |                           |                           |                           |
|  | Adult <i>IL-7R</i> <sup>-/-</sup>                           | 10<br>Axillary<br>Inguinal |                           |                           |                           |
|  | New Born <i>Rag</i> <sup>-/-</sup>                          | 8<br>Axillary<br>Inguinal  |                           |                           |                           |
|  | NB <i>IL2rγ</i> <sup>-/-</sup> <i>Rag</i> <sup>-/-</sup>    | 8<br>Axillary<br>Inguinal  | 8<br>Axillary<br>Inguinal | 8<br>Axillary<br>Inguinal | 5<br>Axillary<br>Inguinal |
|  | NB <i>aly/aly</i>                                           | 8<br>N/A                   |                           |                           |                           |
|  | NB <i>IL7R</i> <sup>-/-</sup>                               | 10<br>Axillary<br>Inguinal |                           |                           |                           |

The table summarizes the recipient mice, the donor cells, the number of mice analyzed and the lymph nodes analyzed and photographed. Where no lymph nodes were present this was marked as N/A.
