# Supplementary material
Source: PubMed Central journal article supplement (PMC1569185)

**(A) GFP+**

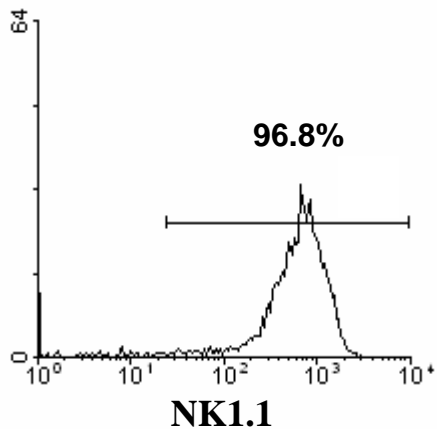

**(B) NK1.1+**

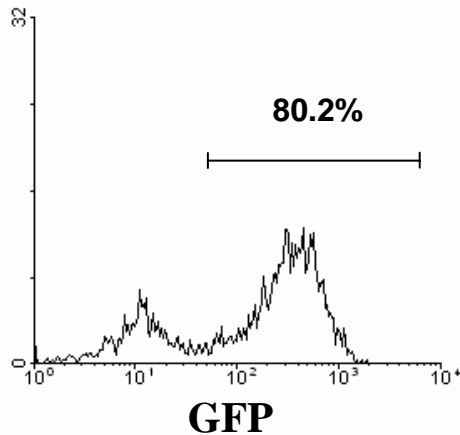

**(C) CD4+ IL7R+**

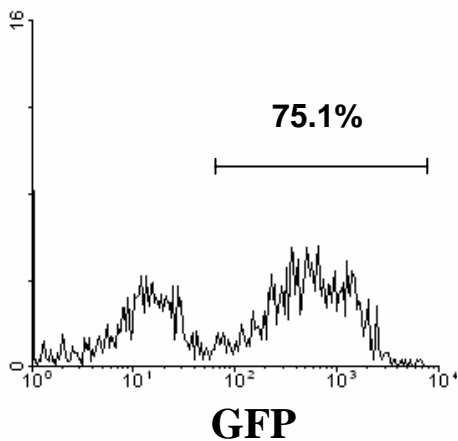

**(D) CD11c+ MHC ClassII+**

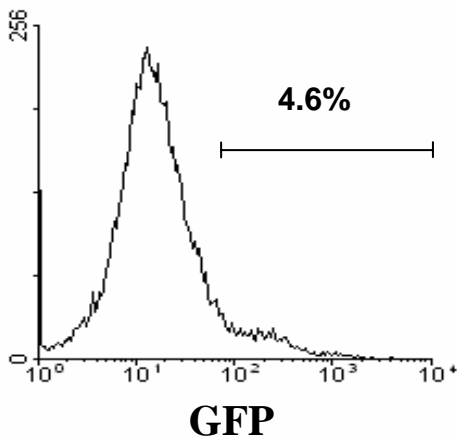

Supplement: pnas_0604183103_1.pdf [file pnas_0604183103_1.pdf]

# B cells 24hrs post transfer into Rag1<sup>-/-</sup> recipients

## Inguinal LN

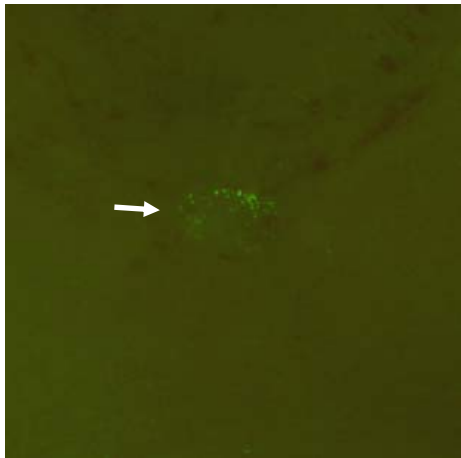

## Brachial LN

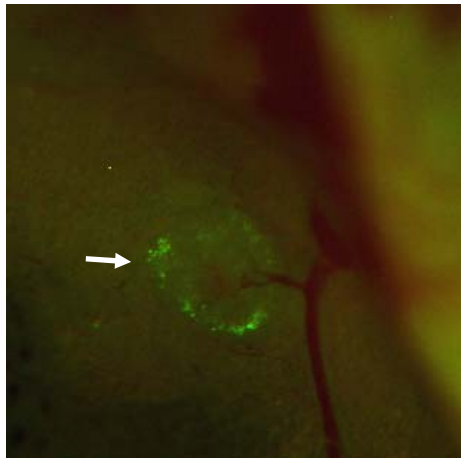

1mm

Supplement: pnas_0604183103_7.pdf [file pnas_0604183103_7.pdf]
